# Supplementary material
Source: PubMed Central journal article supplement (PMC6978149)
Supplement: EMS84667-supplement-Appendix.pdf [file EMS84667-supplement-Appendix.pdf]

## Appendix

### Generalized- $\alpha$ time integration

After spatial discretization of (46)–(47) we get the following degenerate hyperbolic system

$$\begin{aligned} \rho_0 \mathbf{M}_h \ddot{\mathbf{u}}(t) + \mathbf{C}_h \dot{\mathbf{u}}(t) + \mathbf{R}_{\text{upper}}(\mathbf{u}(t), \mathbf{p}(t)) &= \mathbf{0}, \\ \mathbf{R}_{\text{lower}}(\mathbf{u}(t), \mathbf{p}(t)) &= \mathbf{0}, \\ \mathbf{u}(0) &= \mathbf{u}_0, \\ \dot{\mathbf{u}}(0) &= \mathbf{u}_0, \end{aligned}$$

where  $\mathbf{M}_h$  denotes the mass matrix;  $\mathbf{C}_h$  denotes an optional damping matrix;  $\ddot{\mathbf{u}}(t)$  denote the unknown nodal accelerations;  $\dot{\mathbf{u}}(t)$  denote the unknown nodal velocities;  $\mathbf{u}(t)$  denote the unknown nodal displacements; and  $\mathbf{p}(t)$  denote the unknown nodal pressure values. We will use the modified generalized- $\alpha$  method proposed in [50]. To this end we introduce the auxiliary velocity  $\mathbf{v} = \dot{\mathbf{u}}$ . Then, applying the standard generalized- $\alpha$  integrator from [28] we obtain

$$\begin{aligned} \mathbf{M}_h \dot{\mathbf{u}}_{n+\alpha_m} - \mathbf{M}_h \mathbf{v}_{n+\alpha_f} &= \mathbf{0}, \quad (48) \\ \rho_0 \mathbf{M}_h \dot{\mathbf{v}}_{n+\alpha_m} + \mathbf{C}_h \mathbf{v}_{n+\alpha_f} + \mathbf{R}_{\text{upper}}^{n+\alpha_f} &= \mathbf{0}, \quad (49) \\ \mathbf{R}_{\text{lower}}^{n+\alpha_f} &= \mathbf{0}, \quad (50) \end{aligned}$$

where

$$\begin{aligned} \mathbf{R}_{\text{upper}}^{n+\alpha_f} &:= \alpha_f \mathbf{R}_{\text{upper}}(\mathbf{u}_{n+1}, \mathbf{p}_{n+1}), \\ &\quad + (1 - \alpha_f) \mathbf{R}_{\text{upper}}(\mathbf{u}_n, \mathbf{p}_n), \\ \mathbf{R}_{\text{lower}}^{n+\alpha_f} &:= \alpha_f \mathbf{R}_{\text{lower}}(\mathbf{u}_{n+1}, \mathbf{p}_{n+1}), \\ &\quad + (1 - \alpha_f) \mathbf{R}_{\text{lower}}(\mathbf{d}_n, \mathbf{p}_n), \end{aligned}$$

and

$$\dot{\mathbf{u}}_{n+\alpha_m} := \alpha_m \dot{\mathbf{u}}_{n+1} + (1 - \alpha_m) \dot{\mathbf{u}}_n, \quad (51)$$

$$\dot{\mathbf{v}}_{n+\alpha_m} := \alpha_m \dot{\mathbf{v}}_{n+1} + (1 - \alpha_m) \dot{\mathbf{v}}_n, \quad (52)$$

$$\mathbf{v}_{n+\alpha_f} := \alpha_f \mathbf{v}_{n+1} + (1 - \alpha_f) \mathbf{v}_n. \quad (53)$$

Moreover, we employ Newmark's approximations, [61],

$$\dot{\mathbf{u}}_{n+1} = \frac{1}{\gamma \Delta t} (\mathbf{u}_{n+1} - \mathbf{u}_n) + \frac{\gamma - 1}{\gamma} \dot{\mathbf{u}}_n, \quad (54)$$

$$\mathbf{v}_{n+1} = \frac{1}{\gamma \Delta t} (\mathbf{v}_{n+1} - \mathbf{v}_n) + \frac{\gamma - 1}{\gamma} \dot{\mathbf{v}}_n \quad (55)$$

Using (48) we observe

$$\dot{\mathbf{u}}_{n+\alpha_m} = \mathbf{v}_{n+\alpha_f}$$

and combining this with (49)–(55) we conclude

$$\mathbf{v}_{n+1} = \frac{\alpha_m}{\alpha_f \gamma \Delta t} (\mathbf{u}_{n+1} - \mathbf{u}_n) + \frac{\gamma - \alpha_m}{\gamma \alpha_f} \dot{\mathbf{u}}_n + \frac{\alpha_f - 1}{\alpha_f} \mathbf{v}_n,$$

$$\begin{aligned} \dot{\mathbf{v}}_{n+1} &= \frac{\alpha_m}{\alpha_f \gamma^2 \Delta t^2} (\mathbf{u}_{n+1} - \mathbf{u}_n) - \frac{1}{\alpha_f \gamma \Delta t} \mathbf{v}_n + \frac{\gamma - 1}{\gamma} \dot{\mathbf{v}}_n \\ &\quad + \frac{\gamma - \alpha_m}{\alpha_f \gamma^2 \Delta t} \dot{\mathbf{u}}_n. \end{aligned}$$

Thus, a dependence of  $\mathbf{v}_{n+1}$  and  $\dot{\mathbf{v}}_{n+1}$  on  $\mathbf{u}_{n+1}$  can be established. Having this the unknown values  $\mathbf{u}_{n+1}, \mathbf{p}_{n+1}$  can be computed with the Newton–Raphson method. Based on [50] we set the parameters depending only on  $\rho_\infty \in [0, 1]$  by

$$\begin{aligned} \alpha_f &:= \frac{1}{1 + \rho_\infty}, \\ \alpha_m &:= \frac{3 - \rho_\infty}{2(1 + \rho_\infty)}, \\ \gamma &:= \frac{1}{2} + \alpha_m - \alpha_f. \end{aligned}$$

In all our simulations we used a value of  $\rho_\infty = 0.5$ .

*Remark on the implementation of the pressure-projection stabilized equal order pair*

Considering the bilinear form  $s_h(p_h, q_h)$  defined in (38) we can rewrite this with a simple calculation into

$$s_h(p_h, q_h) := \sum_{l=1}^{n_{el}} \left( \int_{K_l} p_h q_h \, dx - \frac{1}{|\tau_l|} \int_{K_l} p_h \, dx \int_{K_l} q_h \, dx \right).$$

Denoting by  $\{\phi_i\}_{i=1}^n$  the chosen ansatz functions the element contribution for an arbitrary element  $K$  to the matrix  $\mathbf{C}_h$  is given by

$$\int_K \phi_i \phi_j \, dx - \frac{1}{|K|} \int_K \phi_i \, dx \int_K \phi_j \, dx.$$

This corresponds to an element mass matrix minus a rank-one correction.

### Static condensation

For completeness we provide a summary for the static condensation used for the MINI element. Consider a finite element  $K \in \mathcal{T}_h$  with a local ordering of the unknowns  $\mathbf{u}$

$$\mathbf{u} = (u_x^1, u_y^1, u_z^1, \dots, u_x^{\text{ndofs}_N}, u_y^{\text{ndofs}_N}, u_z^{\text{ndofs}_N}, u_{x,B}^1, u_{y,B}^1, u_{z,B}^1, \dots, u_{x,B}^{\text{ndofs}_B}, u_{y,B}^{\text{ndofs}_B}, u_{z,B}^{\text{ndofs}_B})$$

and  $\mathbf{p}$  as

$$\mathbf{p} = (p^1, p^2, \dots, p^{\text{ndofs}_N}).$$

Here,  $\text{ndofs}_N$  corresponds to the nodal degrees of freedom per element and  $\text{ndofs}_B$  to the bubble degrees of freedom (one for tetrahedral elements and two for hexahedral elements). Then the element contribution to the global saddle-point system can be written as

$$\begin{pmatrix} \mathbf{K}_{NN} & \mathbf{K}_{NB} & \mathbf{B}_N^\top \\ \mathbf{K}_{BN} & \mathbf{K}_{BB} & \mathbf{B}_B^\top \\ \mathbf{B}_N & \mathbf{B}_B & \mathbf{C}_N \end{pmatrix} \begin{pmatrix} \Delta \mathbf{u}_N \\ \Delta \mathbf{u}_B \\ \Delta \mathbf{p} \end{pmatrix} = \begin{pmatrix} -\mathbf{R}_N^{\text{upper}} \\ -\mathbf{R}_B^{\text{upper}} \\ -\mathbf{R}_N^{\text{lower}} \end{pmatrix}.$$

The bubble part of the stiffness matrix,  $\mathbf{K}_{\text{BB}}$  is local to the element and can be directly inverted. This gives the condensed system

$$\begin{pmatrix} \mathbf{K}_{\text{eff}} & \mathbf{B}_{\text{eff}}^T \\ \mathbf{B}_{\text{eff}} & \mathbf{C}_{\text{eff}} \end{pmatrix} \begin{pmatrix} \Delta \mathbf{u}_N \\ \Delta \mathbf{p} \end{pmatrix} = \begin{pmatrix} -\mathbf{R}_{\text{eff}}^{\text{upper}} \\ -\mathbf{R}_{\text{eff}}^{\text{lower}} \end{pmatrix},$$

where the effective matrices and vectors are given as

$$\begin{aligned} \mathbf{K}_{\text{eff}} &:= \mathbf{K}_{\text{NN}} - \mathbf{K}_{\text{NB}} \mathbf{K}_{\text{BB}}^{-1} \mathbf{K}_{\text{BN}} \\ \mathbf{B}_{\text{eff}} &:= \mathbf{B}_N - \mathbf{B}_B \mathbf{K}_{\text{BB}}^{-1} \mathbf{K}_{\text{BN}}, \\ \mathbf{C}_{\text{eff}} &:= \mathbf{C}_N - \mathbf{B}_B \mathbf{K}_{\text{BB}}^{-1} \mathbf{B}_B^T, \\ \mathbf{R}_{\text{eff}}^{\text{upper}} &:= \mathbf{R}_N^{\text{upper}} - \mathbf{K}_{\text{NB}} \mathbf{K}_{\text{BB}}^{-1} \mathbf{R}_B^{\text{upper}}, \\ \mathbf{R}_{\text{eff}}^{\text{lower}} &:= \mathbf{R}_N^{\text{lower}} - \mathbf{B}_B \mathbf{K}_{\text{BB}}^{-1} \mathbf{R}_B^{\text{upper}}. \end{aligned}$$

The effective matrices and vectors can then be assembled in a standard way into the global system. The bubble update contributions can be calculated once  $\Delta \mathbf{u}_N$  and  $\Delta \mathbf{p}_N$  are known as

$$\Delta \mathbf{u}_B = -\mathbf{K}_{\text{BB}}^{-1} (\mathbf{R}_B^{\text{upper}} + \mathbf{K}_{\text{BN}} \Delta \mathbf{u}_N + \mathbf{B}_B^T \Delta \mathbf{p}_N).$$

### Tensor calculus

We use the following results from tensor calculus, for more details we refer to, e.g., [45, 84].

$$\begin{aligned} \frac{\partial \bar{\mathbf{C}}}{\partial \mathbf{C}} &= J^{-\frac{2}{3}} \mathbb{P} = J^{-\frac{2}{3}} \left( \mathbb{I} - \frac{1}{3} \mathbf{C}^{-1} \otimes \mathbf{C} \right), \\ \frac{\partial \mathbf{C}^{-1}}{\partial \mathbf{C}} &= -\mathbf{C}^{-1} \odot \mathbf{C}^{-1}, \\ (\mathbf{A} \odot \mathbf{A})_{ijkl} &:= \frac{1}{2} (A_{ik} A_{jl} + A_{il} A_{jk}). \end{aligned}$$

For symmetric  $\mathbf{A}$  it holds

$$\mathbb{P} : \mathbf{A} = \text{Dev}(\mathbf{A}) = \mathbf{A} - \frac{1}{3} (\mathbf{A} : \mathbf{C}) \mathbf{C}^{-1}.$$

The isochoric part of the second Piola–Kirchhoff stress tensor as well as the isochoric part of the fourth order elasticity tensor are given as

$$\mathbf{S}_{\text{isc}} := 2 \frac{\partial \bar{\Psi}(\bar{\mathbf{C}})}{\partial \bar{\mathbf{C}}} = J^{-\frac{2}{3}} \text{Dev}(\bar{\mathbf{S}}), \quad (56)$$

$$\bar{\mathbf{S}} := 2 \frac{\partial \bar{\Psi}(\bar{\mathbf{C}})}{\partial \bar{\mathbf{C}}},$$

$$\mathbb{C}_{\text{isc}} := 4 \frac{\partial \bar{\Psi}(\bar{\mathbf{C}})}{\partial \bar{\mathbf{C}} \partial \bar{\mathbf{C}}} \quad (57)$$

$$= J^{-\frac{4}{3}} \mathbb{P} \bar{\mathbb{C}} \mathbb{P}^T + J^{-\frac{2}{3}} \frac{2}{3} \text{tr}(\bar{\mathbf{C}} \bar{\mathbf{S}}) \tilde{\mathbb{P}}$$

$$- \frac{4}{3} \mathbf{S}_{\text{isc}} \overset{\text{S}}{\otimes} \mathbf{C}^{-1},$$

$$\bar{\mathbb{C}} := 4 \frac{\partial \bar{\Psi}(\bar{\mathbf{C}})}{\partial \bar{\mathbf{C}} \partial \bar{\mathbf{C}}},$$

$$\tilde{\mathbb{P}} := \mathbf{C}^{-1} \odot \mathbf{C}^{-1} - \frac{1}{3} \mathbf{C}^{-1} \otimes \mathbf{C}^{-1},$$

$$\mathbf{A} \overset{\text{S}}{\otimes} \mathbf{B} := \frac{1}{2} (\mathbf{A} \otimes \mathbf{B} + \mathbf{B} \otimes \mathbf{A}).$$
